# Supplementary material for: The difference between oats and beta-glucan extract intake in the management of HbA1c, fasting glucose and insulin sensitivity: a meta-analysis of randomized controlled trials
Source: Royal Society of Chemistry journal article supplement (doi:10.1039/c5fo01364j), 2016-01-01
Supplement: c5fo01364j1.pdf [file c5fo01364j1.pdf]

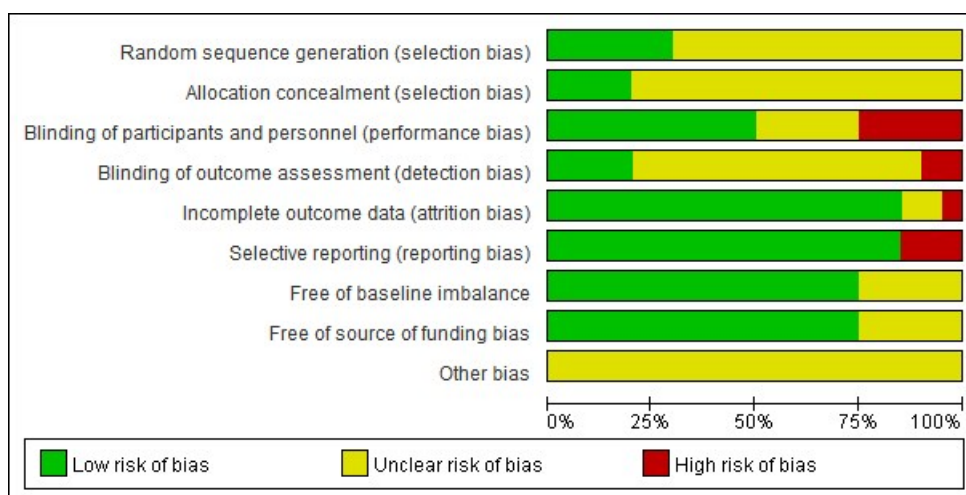

Supplemental Fig. 1. Risk of bias graph: review authors' judgements about each risk of bias item presented as percentages across all included studies.
