# Supplementary material for: The difference between oats and beta-glucan extract intake in the management of HbA1c, fasting glucose and insulin sensitivity: a meta-analysis of randomized controlled trials
Source: Royal Society of Chemistry journal article supplement (doi:10.1039/c5fo01364j), 2016-01-01
Supplement: c5fo01364j2.pdf [file c5fo01364j2.pdf]

|                           | Random sequence generation (selection bias) | Allocation concealment (selection bias) | Blinding of participants and personnel (performance bias) | Blinding of outcome assessment (detection bias) | Incomplete outcome data (attrition bias) | Selective reporting (reporting bias) | Free of baseline imbalance | Free of source of funding bias | Other bias |
|---------------------------|---------------------------------------------|-----------------------------------------|-----------------------------------------------------------|-------------------------------------------------|------------------------------------------|--------------------------------------|----------------------------|--------------------------------|------------|
| Bays 2011 (32)            | ?                                           | ?                                       | +                                                         | ?                                               | +                                        | +                                    | +                          | +                              | ?          |
| Beck 2010 (40)            | +                                           | ?                                       | +                                                         | ●                                               | +                                        | +                                    | +                          | +                              | ?          |
| Biorklund 2005 (34)       | ?                                           | ?                                       | +                                                         | ●                                               | +                                        | +                                    | +                          | +                              | ?          |
| Biorklund 2008 (33)       | ?                                           | +                                       | +                                                         | ?                                               | +                                        | +                                    | +                          | +                              | ?          |
| Cugnet-Anceau 2010 (28)   | ?                                           | ?                                       | +                                                         | ?                                               | +                                        | ●                                    | +                          | +                              | ?          |
| Day 2002 (41)             | ?                                           | ?                                       | ●                                                         | +                                               | +                                        | +                                    | ?                          | +                              | ?          |
| Kabir 2002 (29)           | +                                           | ?                                       | +                                                         | ?                                               | +                                        | +                                    | +                          | +                              | ?          |
| Li 2011 (30)              | ?                                           | ?                                       | ●                                                         | ?                                               | +                                        | +                                    | +                          | +                              | ?          |
| Lovegrove 2000 (38)       | +                                           | +                                       | +                                                         | ?                                               | +                                        | +                                    | +                          | ?                              | ?          |
| Ma 2013 (27)              | +                                           | ?                                       | ●                                                         | +                                               | +                                        | +                                    | +                          | +                              | ?          |
| Queenan 2007 (39)         | ?                                           | ?                                       | +                                                         | ?                                               | +                                        | +                                    | +                          | +                              | ?          |
| Reyna-Villasmil 2007 (35) | ?                                           | ?                                       | ?                                                         | ?                                               | +                                        | +                                    | ?                          | ?                              | ?          |
| Rondanelli 2011 (36)      | +                                           | +                                       | ?                                                         | ?                                               | +                                        | +                                    | ?                          | ?                              | ?          |
| Saltzman 2001 (42)        | ?                                           | ?                                       | ?                                                         | ?                                               | ?                                        | +                                    | +                          | +                              | ?          |
| Stevens 1985 (22)         | ?                                           | ?                                       | ?                                                         | ?                                               | +                                        | ●                                    | +                          | ?                              | ?          |
| Tighe 2010 (24)           | +                                           | ?                                       | ●                                                         | +                                               | +                                        | +                                    | +                          | +                              | ?          |
| Uusitupa 1992 (37)        | ?                                           | ?                                       | +                                                         | ?                                               | ●                                        | ●                                    | ?                          | +                              | ?          |
| Zhang 2010 (31)           | ?                                           | ?                                       | ●                                                         | ?                                               | +                                        | +                                    | +                          | +                              | ?          |

Supplemental Fig. 2. Risk of bias summary: review authors' judgements about each risk of bias item for each included study.
